# Supplementary material
Source: Springer Nature journal article supplement (https://www.springermedizin.de/resource/supplementary/12936_2008_652_MOESM4_ESM.pdf/9547920)

**A**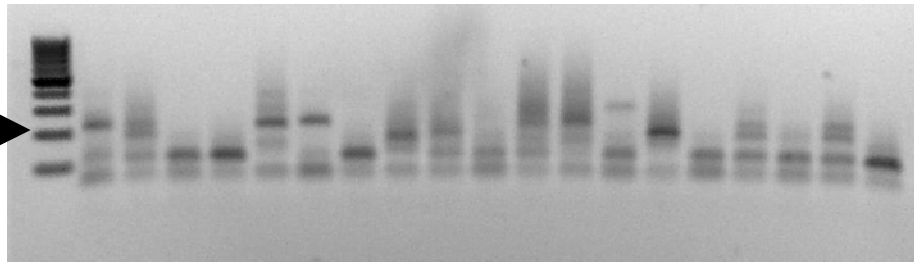**B**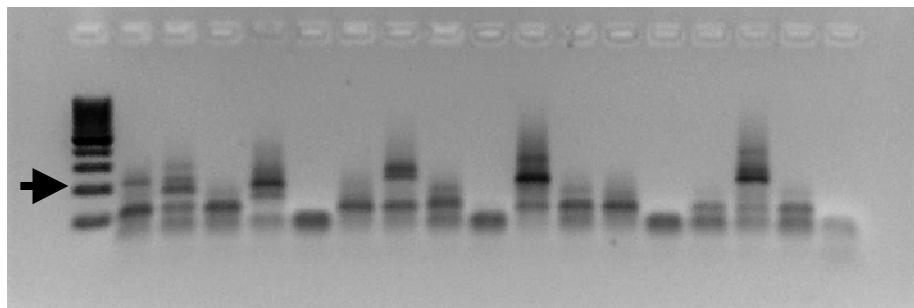**C**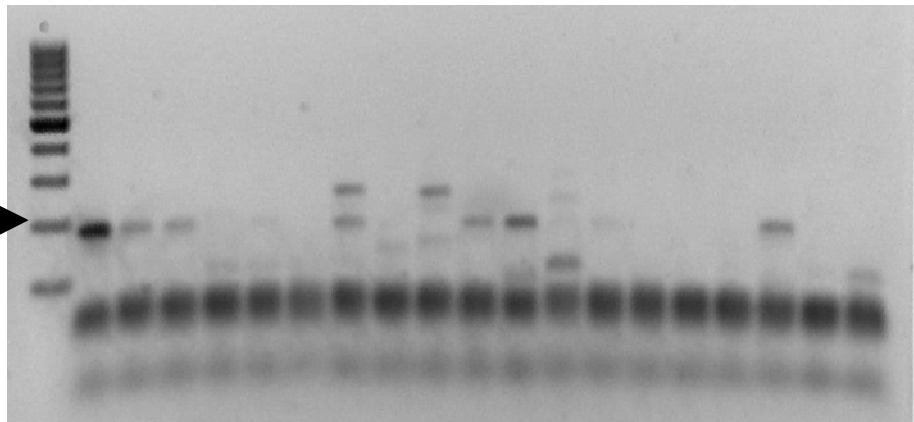

Supplement: MOESM4 [file 9547920]
